# Supplementary material for: Premise and peril of Wnt signaling activation through GSK-3β inhibition
Source: PubMed Central journal article supplement — iScience. 2022 Mar 25;25(4):104159. doi: 10.1016/j.isci.2022.104159 (PMC9010644; doi:10.1016/j.isci.2022.104159), 2022-03-25
Supplement: mmc1.pdf [file mmc1.pdf]

**iScience, Volume 25**

**Supplemental information**

**Premise and peril of Wnt signaling  
activation through GSK-3 $\beta$  inhibition**

**Samuel M. Law and Jie J. Zheng**

|     |      | CHIR (0.1)                                                        | CHIR (10)                                                                                                                                                                                                      | AR (10)                                                                                                                                                                                                                                  | TWS (3.3)                                                                                | TWS (10)                                                                                                                                                                                                                                                                                                                                                                                                                         |
|-----|------|-------------------------------------------------------------------|----------------------------------------------------------------------------------------------------------------------------------------------------------------------------------------------------------------|------------------------------------------------------------------------------------------------------------------------------------------------------------------------------------------------------------------------------------------|------------------------------------------------------------------------------------------|----------------------------------------------------------------------------------------------------------------------------------------------------------------------------------------------------------------------------------------------------------------------------------------------------------------------------------------------------------------------------------------------------------------------------------|
| PC3 | Up   | <i>BIN1</i><br><i>LARGE</i>                                       | <u><i>CIAPIN1</i></u><br><u><i>EXOC3</i></u><br><u><i>GNAI1</i></u><br><u><i>MLF1</i></u><br><u><i>RDH11</i></u><br><u><i>SENP6</i></u><br><u><i>ST7</i></u><br><u><i>TM9SF3</i></u><br><u><i>TMEM194A</i></u> | <u><i>CD9</i></u><br><u><i>CPE</i></u><br><u><i>FAM69A</i></u><br><u><i>HLA-DOA1</i></u><br><u><i>IGFBP5</i></u><br><u><i>IGL@</i></u><br><u><i>PCP4</i></u><br><u><i>PLA2G4A</i></u><br><u><i>SELENBP1</i></u><br><u><i>TMEM158</i></u> | <u><i>PSPH</i></u>                                                                       | <u><i>AIF1</i></u><br><u><i>HIST1H2AC</i></u><br><u><i>MMP1</i></u><br><u><i>SERPINE1</i></u>                                                                                                                                                                                                                                                                                                                                    |
|     | Down | <u><i>KLF5</i></u><br><u><i>SEPT7</i></u><br><u><i>ZNF148</i></u> | <u><i>ADO</i></u><br><u><i>EIF1AY</i></u><br><u><i>RAB30</i></u>                                                                                                                                               | <u><i>AGR2</i></u><br><u><i>ANKRD10</i></u><br><u><i>CDH2</i></u><br><u><i>EIF5</i></u><br><u><i>FOLR1</i></u><br><u><i>HOXC6</i></u><br><u><i>HSPA1A</i></u><br><u><i>POLD4</i></u><br><u><i>RPL37A</i></u><br><u><i>SCD</i></u>        | <u><i>ACLY</i></u><br><u><i>CYP1B1</i></u><br><u><i>DFFB</i></u><br><u><i>ZDHHC6</i></u> | <u><i>ADO</i></u><br><u><i>ALDH1A3</i></u><br><u><i>C16ORF59</i></u><br><u><i>C22ORF29</i></u><br><u><i>CYP1B1</i></u><br><u><i>DFFB</i></u><br><u><i>FOSL1</i></u><br><u><i>HNRNPU</i></u><br><u><i>IER3</i></u><br><u><i>IGFBP3</i></u><br><u><i>IL8</i></u><br><u><i>MAFF</i></u><br><u><i>MMP11</i></u><br><u><i>MYC</i></u><br><u><i>PDLIM1</i></u><br><u><i>PLEK</i></u><br><u><i>SERPINE1</i></u><br><u><i>TIPARP</i></u> |

**Supplemental Table 1:** The genes documented in the L1000 database (Keenan *et al.*, 2018) are affected by three GSK-3 $\beta$  inhibitors, CHIR: CHIR-99021, AR: AR-A014418, and TWS: TWS-119, in PC3 cells. Underlined genes represent those that exhibit altered gene expression in both PC3 and HA1E (supplemental table 2) cells. Although PC3 and HA1E cells differ significantly in embryonic origin, a large portion of the affected genes shared between these two cell lines exhibit overlap when treated with these three GSK-3 $\beta$  inhibitors. The double-underlined and red-font genes exhibit altered gene expression in both PC3 and HA1E cell lines and are altered by at least one other perturbagen (CHIR-99021, AR-A014418, TWS-119). The concentrations (in  $\mu$ M) of the compounds used to treat the cells are indicated in the parentheses.

|      |      | CHIR (10)                                                                                                                                                                                         | AR (10)                                                                                                                                                                                                                                              | TWS (1.1)                                                   | TWS (3.3)                                                                                                                                                                                        | TWS (10)                                                                                                                                                                                                                                                                                                                                                                                                                                                          |
|------|------|---------------------------------------------------------------------------------------------------------------------------------------------------------------------------------------------------|------------------------------------------------------------------------------------------------------------------------------------------------------------------------------------------------------------------------------------------------------|-------------------------------------------------------------|--------------------------------------------------------------------------------------------------------------------------------------------------------------------------------------------------|-------------------------------------------------------------------------------------------------------------------------------------------------------------------------------------------------------------------------------------------------------------------------------------------------------------------------------------------------------------------------------------------------------------------------------------------------------------------|
| HA1E | Up   | <u>CIAPIN1</u><br><u>EIF3G</u><br><u>EPAG</u><br><u>GNAI1</u><br><u>MAPK11P1L</u><br><u>MLF1</u><br><u>PCDH11Y</u><br><u>RDH11</u><br><u>SENP6</u><br><u>SNX13</u><br><u>ST7</u><br><u>TM9SF3</u> | <u>ATF3</u><br><u>CPE</u><br><u>EMP1</u><br><u>GPNMB</u><br><u>HIST1H1C</u><br><u>HLA-DOA1</u><br><u>IGFBP5</u><br><u>LAPTM5</u><br><u>MMP9</u><br><u>PCP4</u><br><u>PLA2G4A</u><br><u>RGS1</u><br><u>S100A8</u><br><u>SPARCL1</u><br><u>TMEM158</u> | <u>AIF1</u><br><u>ALDOB</u><br><u>ATP5S</u><br><u>RNF10</u> | <u>ALDOB</u><br><u>ATP5S</u><br><u>PSPH</u><br><u>RNF10</u>                                                                                                                                      | <u>CFB</u><br><u>CXCR4</u><br><u>HIST1H2AC</u><br><u>PSPH</u><br><u>RNF10</u><br><u>S100A8</u><br><u>ZMYND8</u>                                                                                                                                                                                                                                                                                                                                                   |
|      | Down | <u>CRADD</u><br><u>DFFB</u><br><u>EIF1AY</u><br><u>KLF5</u><br><u>LPAR1</u><br><u>PPP2R5D</u><br><u>RSG1</u><br><u>SLC16A3</u><br><u>TRIM23</u><br><u>VPS13A</u><br><u>XPO6</u>                   | <u>CDH2</u><br><u>EIF5</u><br><u>GAS1</u><br><u>NIPSNAP1</u><br><u>POLD4</u><br><u>PTGIS</u><br><u>SCD</u><br><u>SLC2A6</u><br><u>TM4SF1</u><br><u>TMEM5</u><br><u>TNFAIP2</u><br><u>TSPAN8</u>                                                      | <u>MMP1</u><br><u>PLEK</u>                                  | <u>ATP9B</u><br><u>COPS6</u><br><u>CXCR4</u><br><u>EIF4E2</u><br><u>HNRNPU</u><br><u>MMP1</u><br><u>MRPL18</u><br><u>PDLIM1</u><br><u>RAB30</u><br><u>SQRDL</u><br><u>TRIOBP</u><br><u>UBE3B</u> | <u>ADQ</u><br><u>ALDH1A3</u><br><u>C16ORF59</u><br><u>C22ORF29</u><br><u>COPS6</u><br><u>CXCR4</u><br><u>CYP1B1</u><br><u>DFFB</u><br><u>DUSP4</u><br><u>FOSL1</u><br><u>HNRNPU</u><br><u>IER3</u><br><u>IGFBP3</u><br><u>IL8</u><br><u>LDLR</u><br><u>MAFF</u><br><u>MANBA</u><br><u>MMP1</u><br><u>MMP11</u><br><u>MRPL18</u><br><u>MYC</u><br><u>PLEK</u><br><u>RAB30</u><br><u>SERPINE1</u><br><u>SQRDL</u><br><u>TIPARP</u><br><u>UBE3B</u><br><u>ZDHHC6</u> |

**Supplemental Table 2:** The genes documented in the L1000 database (Keenan *et al.*, 2018) are affected by three GSK-3 $\beta$  inhibitors, CHIR: CHIR-99021, AR: AR-A014418, and TWS: TWS-119, in HA1E cells. Underlined genes represent those that exhibit altered gene expression in both HA1E and PC3 (supplemental table 1) cells. Although PC3 and HA1E cells differ significantly in embryonic origin, a

large portion of the affected genes shared between these two cell lines exhibit overlap when treated with these three GSK-3 $\beta$  inhibitors. The double-underlined and red-font genes exhibit altered gene expression in both PC3 and HA1E cell lines and are altered by at least one other perturbagen (CHIR-99021, AR-A014418, TWS-119). The concentrations (in  $\mu$ M) of the compounds used to treat the cells are indicated in the parentheses.
